# Supplementary material
Source: MDPI journal article supplement (https://www.mdpi.com/2071-1050/14/18/11415)
Supplement: s1 [file s1 › sustainability-1824066-supplementary.pdf]

## Supplementary Information

### *SI-1.1 Data on Internet Access Flexibility*

The FCCs Census Tract Internet Services database (Federal Communications Commission 2020a) provides data on ISPs offering fixed-connection services to at least one establishment (e.g., a residence or business) in a given census tract. Although the data provide a good measure of availability, they do not provide insights into the accessibility of services. As such, a ZIP-code-based fixed-connections dataset with accessibility data was also used (Pease 2020). Although many of the data collected between both of these sources encompass similar fields, any effects from duplicate attributes were removed within the exploratory factor analysis (EFA), as described in the main body of the manuscript. For a study of mobile (cellular) internet services, data on the percent coverage per census tract by different carriers were downloaded from the FCC (Federal Communications Commission 2020b). To assess internet accessibility, data on public internet access by county were downloaded from the FCC (Federal Communications Commission 2020c). As a further assessment of accessibility, data on complaints filed with the FCC were incorporated. These ZIP-code-based complaints are organized by category. For the purposes of this study, complaints relating to “Speed”, “Equipment”, and “Availability” were reclassified as complaints on lack of access; this grouping accounted for nearly 46% of complaints to the FCC.

### *SI-1.2 Data on Disruption Risk*

County-based data from FEMA on National Flood Insurance Program payouts were downloaded (FEMA 2019). FEMA databases on disaster declarations in Texas between 1953 and 2020 were also included (FEMA 2020); this dataset was categorized by the county-based number of disaster declarations per disaster type for each county in Texas. The data source that provided the majority of the sudden-onset disaster (SOD) data for this project was the NOAA NCEI’s Storm Events Database (NOAA National Centers for Environmental Information 2020). This dataset records all storm events between 1950 and 2020, categorized by 49 different storm types, and has associated data for damages, deaths, and injuries. This dataset was summarized by aggregating all storms of a particular type per county, along with their corresponding injuries, deaths, and damages.

### *SI-1.3 Data on Disruption Vulnerability*

Telemedicine requires interactive audiovisual communications between providers and patients, which is usually fulfilled through the internet, making the industry and the patients vulnerable to internet outages. Similarly, a majority of students rely on online resources to complete their in-classroom activities (National Center for Education Statistics 2019). Moreover, throughout the COVID-19 pandemic, a significant number of students continue to attend school virtually (Roche 2020). Finally, advanced industries encompass wide-ranging economic sectors that spend relatively high amounts of their budget on research and development, for which the internet is a critical tool.

For variable reduction to be effective, the variables being studied must have underlying common factors. This is not the case for disruption vulnerability. Disruption vulnerability examines broad categories (e.g., disruptions to healthcare, education, and advanced industries) that are not necessarily directly related to one another. As such, each of these was identified as a sub-contributor to disruption vulnerability. These were analyzed separately, and an overall disruption vulnerability rank was calculated as the mean of the sub-contributor rankings. Sections 2.4.1 through 2.4.3 provide a brief description of the datasets used for each of the sub-contributors to disruption vulnerability.

---

#### *SI-1.3.1 Telemedicine Disruption Vulnerability*

To identify the counties that would be the most impacted by a disruption in telemedicine, healthcare infrastructure data were used. Department of Homeland Security (DHS) data on hospital locations (Department of Homeland Security 2020) were obtained and merged with Texas Department of Health and Human Services data on hospital beds per hospital (Texas Department of Health and Human Services 2016). Moreover, a series of resources from the US Health Resources and Services Administration comprising medically underserved areas and healthcare facility information were collected (Health Resources and Services Administration 2020). The data allowed for an assessment of the specific locations that may be more dependent on telemedicine, as areas with onsite facilities are not exclusively reliant on offsite virtual care.

#### *SI-1.3.2 Education Disruption Vulnerability*

County-based data on K–12 student enrollment were obtained from the TEA (Texas Education Agency 2020). Higher education enrollment data were also obtained from THED (Texas Higher Education Data 2020) and merged with a Homeland Infrastructure Foundation-Level Data (HFILD) vector on university locations (Department of Homeland Security 2019). The enrollment and university data were spatially joined with the counties where they belonged. The data were statistically summarized by aggregating total student credit hours (SCHs) by type and total universities by county. It should be noted that internet use was studied relative to the education delivery location (school/university), and not relative to the residences of the students, since the latter presents a significant challenge due to the disperse nature of the geographies from which student attendance at a specific university is derived.

#### *SI-1.3.3 Labor Disruption Vulnerability*

While it is likely that most industrial sectors rely on the internet in some way, for the purposes of this study, the advanced industries (as enumerated by Rothwell and Kulkarni, 2015) were defined as those that would be significantly disrupted in case of an internet outage (Rothwell and Kulkarni 2015). These are listed in Table S2 of the SI. County-based data from the Bureau of Labor Statistics (BLS) for each of these industries were downloaded and summarized. Five-point summaries and means were obtained for each county's location quotient (LQ) distribution, and the quarterly wage and employment per capita were summarized per county. LQs compare the distribution of an industry in a county with respect to the entire US by dividing the concentration of the county's jobs in that industry by the concentration of nationwide jobs in that industry (US Bureau of Labor Statistics 2020).

#### *SI-2.0 Digital Divides*

Disparities in availability and accessibility are addressed through the concept of digital divides. A digital divide is caused by the differences in access and quality of technological resources, including the internet. The first-level digital divide considers whether a particular population has access to technological resources, while a second-level digital divide (SLDD) refers to the quality of such access. Given that there are important geospatial differences in the SLDD (Swain and Pearson 2003; Cruz-Jesus et al. 2016; Hohlfeld et al. 2017; Hamburg and Lütgen 2019), this paper characterizes digital divides as a measure of the flexibility of internet access.

**Table S1.** Description of datasets used for geospatial analysis; note that the summary of attributes is not all-inclusive.

|                          | Source              | Dataset Name                | Data Date               | Basis        | Summary Attributes in Dataset                                                                                                                                                                                           |
|--------------------------|---------------------|-----------------------------|-------------------------|--------------|-------------------------------------------------------------------------------------------------------------------------------------------------------------------------------------------------------------------------|
| Internet Access          | FCC                 | Census Tract ISP Offerings  | June 2019               | Census Tract | Maximum Upload/Download Speed<br>Technology<br>Number of Residential/Business Providers<br>Total Number of Providers<br>Maximum Upload/Download Speed by Technology<br>Total Providers by Technology                    |
|                          | High Speed Internet | ZIP Code ISP Offerings      | June 2020               | Zip Code     | Maximum Upload/Download Speed<br>Technology<br>Maximum Availability<br>Number of Residential/Business Providers<br>Maximum Upload/Download Speed by Technology<br>Providers by Technology<br>Availability by Technology |
|                          | FCC                 | Internet Access Data        | June 2017 and Dec. 2017 | Census Tract | Households with Broadband Access (10 mb Up, 1 mb Down) in Census Tract (Rounded to the Nearest 20%)<br>Households with Internet in Census Tract (Rounded to Nearest 20%)                                                |
|                          | FCC                 | Public Complaint Data       | 2015–2020               | Zip Code     | Amount of Complaints (by Type of Complaint)                                                                                                                                                                             |
|                          | FCC                 | Public Internet Access Data | Dec. 2018               | County       | Rural Percent Access to Broadband<br>Rural Percent Access to Cellular<br>Rural Percent Access to Both<br>Urban Percent Access to Broadband<br>Urban Percent Access to Cellular<br>Urban Percent Access to Both          |
|                          | FCC                 | Operator Coverage Maps      | June 2019               | Census Tract | % Max Coverage of Census Tract<br>Number of Carriers in Census Tract                                                                                                                                                    |
|                          | FEMA                | Disaster Declarations       | 1950–2020               | County       | Type of Disaster Declaration<br>Date of Disaster Declaration                                                                                                                                                            |
| Dis. Risk                | FEMA                | NFIP Claims                 | TBD                     | County       | Flood Insurance Paid on Building Damage<br>Flood Insurance Paid on Building Contents<br>Flood Insurance Paid on Compliance<br>Total Flood Insurance Paid                                                                |
|                          | NCEI                | Storm Events                | 2019                    | County       | Injuries by Storm Type (42 Types)<br>Deaths by Storm Type (42 Types)<br>Damage to Property by Storm (42 Types)<br>Damage to Crops by Storm Type (42 Types)<br>Total Damage by Storm Type (42 Types)                     |
|                          | BLS                 | Labor Statistics            | 2019                    | County       | Total Wages (Q1–Q4 and Yearly Average)<br>Total Employed (Q1–Q4 Yearly Average)<br>Relative Concentration of Wages (5-Point Summary and Average)<br>Relative Concentration of Employers (5-Point Summary and Average)   |
| Disruption Vulnerability | TEA                 | K–12 Enrollment             | 2019                    | County       | 1–8 Enrollment<br>9–12 Enrollment                                                                                                                                                                                       |

---

|           |                                    |      |                    |                                                           |
|-----------|------------------------------------|------|--------------------|-----------------------------------------------------------|
| TCES      | University Enrollment              | 2019 | N/A<br>(Shapefile) | SCH Attempted<br>Total Enrollment                         |
| HRSA      | Medically Underserved Areas        | N/A  | N/A<br>(Shapefile) | Polygons of Medically Underserved Areas                   |
| HRSA      | Primary Healthcare Facilities      | N/S  | N/A<br>(Shapefile) | Locations of Primary Care Facilities                      |
| HRSA      | Health Professional Shortage Areas | N/A  | N/A<br>(Shapefile) | Polygons of Dental, Mental, and Physician Shortage Areas. |
| DHS/TDSHS | Hospitals                          | N/A  | N/A<br>(Shapefile) | Total Hospital Beds<br>Total Employees                    |

---

**Table S2.** Notable cluster characteristics for internet access EFA; the median is presented unless otherwise indicated.

| Cluster (Rank) | Number of Census Tracts | Total Fiber Availability (%) | Mean Non-Satellite Availability (%) | Mean Non-Satellite Speeds (bps) | ISPs per Tract | % Rural Access to Broadband and Cellular | % Urban Access to Broadband and Cellular |
|----------------|-------------------------|------------------------------|-------------------------------------|---------------------------------|----------------|------------------------------------------|------------------------------------------|
| Outliers (4)   | 237                     | 194*                         | 95.22                               | 925,843.88                      | 6              | 88.2                                     | 99.8                                     |
| 1 (5)          | 708                     | 100                          | 100.00                              | 1,000,000.00                    | 5              | 88.2                                     | 94.5                                     |
| 2 (3)          | 1425                    | 100                          | 99.70                               | 996,042.11                      | 5              | 84.6                                     | 99.7                                     |
| 3 (6)          | 1177                    | 100                          | 100.00                              | 994,494.48                      | 5              | 99.9                                     | 100                                      |
| 4 (1)          | 955                     | 0                            | 86.07                               | 88,072.25                       | 3              | 84.6                                     | 99.9                                     |
| 5 (2)          | 751                     | 0                            | 97.62                               | 992,596.54                      | 4              | 75                                       | 99.7                                     |

\*Over 100% signifies more than one type of fiber available.

**Table S3.** Notable cluster characteristics for disruption risk EFA; the median is presented unless otherwise indicated.

| Cluster (Rank) | # of Counties | Hurricane Disaster Declarations | Total Disaster Declarations | Property Damage PC | Total Crop Damage PC | Total Damage PC | Flood Insurance Paid PC (NFIP) |
|----------------|---------------|---------------------------------|-----------------------------|--------------------|----------------------|-----------------|--------------------------------|
| Outliers (1)   | 19            | 4                               | 16                          | 19,845.64          | 263.55               | 21,132.54       | 18.12                          |
| 1 (6)          | 153           | 4                               | 17                          | 497.46             | 7.77                 | 574.20          | 23.85                          |
| 2 (3)          | 9             | 4                               | 19                          | 687.15             | 12,565.32            | 13,516.70       | 97.59                          |
| 3 (2)          | 10            | 7.5                             | 24                          | 9472.35            | 178.74               | 9762.39         | 117.15                         |
| 4 (5)          | 60            | 3                               | 15                          | 2827.25            | 526.76               | 3843.30         | 8.42                           |
| 5 (4)          | 3             | 6                               | 14                          | 38,767.59          | 2730.91              | 40,626.22       | 6.01                           |

PC = per capita.

**Table S4.** Notable cluster characteristics for labor disruption vulnerability EFA; the mean is presented unless otherwise indicated.

| Cluster (Rank) | # of Counties | Yearly Advanced Industries Employment PC | Yearly Wage PC | LQ for Establishments - Median | LQ for Establishments - Max |
|----------------|---------------|------------------------------------------|----------------|--------------------------------|-----------------------------|
| Outliers (1)   | 7             | 0.34                                     | 10,660.85      | 38.84                          | 27.32                       |
| 1 (5)          | 50            | 0.03                                     | 535.44         | 1.80                           | 5.10                        |
| 2 (3)          | 16            | 0.12                                     | 3054.13        | 3.59                           | 3.20                        |
| 3 (6)          | 144           | 0.00                                     | 78.01          | 0.62                           | 2.48                        |
| 4 (4)          | 30            | 0.06                                     | 1370.21        | 3.78                           | 6.97                        |
| 5 (2)          | 7             | 0.21                                     | 5689.68        | 20.61                          | 27.60                       |

PC = per capita, LQ = location quotient.

**Table S5.** Notable cluster characteristics for education disruption vulnerability EFA; the mean is presented unless otherwise indicated.

| Cluster (Rank) | # of Counties | Universities per 100,000 | SCH At-tempted PC | SCH Face to Face At-tempted PC | K-8 Enrollment PC | 9-12 Enrollment PC |
|----------------|---------------|--------------------------|-------------------|--------------------------------|-------------------|--------------------|
| Outliers (1)   | 10            | 2.75                     | 2.61              | 1.68                           | 0.13              | 0.07               |
| 1 (3)          | 15            | 1.92                     | 0.64              | 0.35                           | 0.11              | 0.05               |
| 2 (6)          | 7             | 0.30                     | 0.00              | 0.00                           | 0.01              | 0.00               |
| 3 (4)          | 125           | 0.86                     | 0.01              | 0.00                           | 0.10              | 0.05               |
| 4 (5)          | 87            | 0.67                     | 0.00              | 0.00                           | 0.13              | 0.06               |
| 5 (2)          | 2             | 2.30                     | 2.10              | 0.91                           | 0.10              | 0.06               |

PC = per capita.

**Table S6.** Notable cluster characteristics for medical disruption vulnerability EFA; the mean is presented unless otherwise indicated.

| Cluster Group (Rank) | # of Counties | Average Hospital Beds per 100,000 | Medically Underserved Area Percent (%) | Primary Care Shortage (%) | Mental Health Shortage (%) | Dental Health Shortage (%) | ICU Beds PC |
|----------------------|---------------|-----------------------------------|----------------------------------------|---------------------------|----------------------------|----------------------------|-------------|
| 1 (2)                | 50            | 224.8                             | 96.795                                 | 100.000                   | 98.000                     | 2.000                      | 198.69      |
| 2 (1)                | 82            | 173.0                             | 100.000                                | 99.311                    | 100.000                    | 100.000                    | 1661.05     |
| 3 (3)                | 41            | 409.8                             | 9.571                                  | 92.683                    | 100.000                    | 100.000                    | 28.67       |
| 4 (5)                | 16            | 275.4                             | 31.014                                 | 7.022                     | 44.034                     | 0.627                      | 16.95       |
| 5 (4)                | 65            | 317.6                             | 9.214                                  | 86.888                    | 98.461                     | 4.616                      | 12.21       |

PC = per capita.

**Table S7.** Advanced industries (Rothwell and Kulkarni, 2015)—in the top 50% of STEM employers as well as in the top 21% for research and development spending per employee.

| NAICS Code | NAICS Title                                                                          |
|------------|--------------------------------------------------------------------------------------|
| 2111       | Oil and Gas Extraction                                                               |
| 2122       | Metal Ore Mining                                                                     |
| 2211       | Electric Power Generation, Transmission, and Distribution                            |
| 3241       | Petroleum and Coal Products Manufacturing                                            |
| 3251       | Basic Chemical Manufacturing                                                         |
| 3252       | Resin, Synthetic Rubber, and Artificial Synthetic Fibers and Filaments Manufacturing |
| 3253       | Pesticide, Fertilizer, and Other Agricultural Chemical Manufacturing                 |
| 3254       | Pharmaceutical and Medicine Manufacturing                                            |
| 3259       | Other Chemical Product and Preparation Manufacturing                                 |
| 3271       | Clay Product and Refractory Manufacturing                                            |
| 3279       | Other Nonmetallic Mineral Product Manufacturing                                      |
| 3311       | Iron and Steel Mills and Ferroalloy Manufacturing                                    |
| 3313       | Alumina and Aluminum Production and Processing                                       |
| 3315       | Foundries                                                                            |
| 3331       | Agriculture, Construction, and Mining Machinery Manufacturing                        |
| 3332       | Industrial Machinery Manufacturing                                                   |
| 3333       | Commercial and Service Industry Machinery Manufacturing                              |
| 3336       | Engine Turbine and Power Transmission Equipment Manufacturing                        |
| 3339       | Other General Purpose Machinery Manufacturing                                        |
| 3341       | Computer and Peripheral Equipment Manufacturing                                      |
| 3342       | Communications Equipment Manufacturing                                               |
| 3343       | Audio and Video Equipment Manufacturing                                              |
| 3344       | Semiconductor and Other Electronic Component Manufacturing                           |
| 3345       | Navigational, Measuring, Electromedical, and Control Instruments Manufacturing       |
| 3346       | Manufacturing and Reproducing Magnetic and Optical Media                             |
| 3351       | Electric Lighting Equipment Manufacturing                                            |
| 3352       | Household Appliance Manufacturing                                                    |
| 3353       | Electrical Equipment Manufacturing                                                   |
| 3359       | Other Electrical Equipment and Component Manufacturing                               |
| 3361       | Motor Vehicle Manufacturing                                                          |
| 3362       | Motor Vehicle Body and Trailer Manufacturing                                         |
| 3363       | Motor Vehicle Parts Manufacturing                                                    |
| 3364       | Aerospace Product and Parts Manufacturing                                            |
| 3365       | Railroad Rolling Stock Manufacturing                                                 |
| 3366       | Ship and Boat Building                                                               |
| 3369       | Other Transportation Equipment Manufacturing                                         |
| 3391       | Medical Equipment and Supplies Manufacturing                                         |
| 3399       | Other Miscellaneous Manufacturing                                                    |
| 5112       | Software Publishers                                                                  |
| 5152       | Cable and Other Subscription Programming                                             |
| 5172       | Wireless Telecommunications Carriers (except Satellite)                              |
| 5174       | Satellite Telecommunications                                                         |
| 5179       | Other Telecommunications                                                             |
| 5182       | Data Processing, Hosting, and Related Services                                       |
| 5191       | Other Information Services                                                           |
| 5413       | Architectural Engineering and Related Services                                       |

|      |                                                           |
|------|-----------------------------------------------------------|
| 5415 | Computer Systems Design and Related Services              |
| 5416 | Management, Scientific, and Technical Consulting Services |
| 5417 | Scientific Research and Development Services              |
| 6215 | Medical and Diagnostic Laboratories                       |

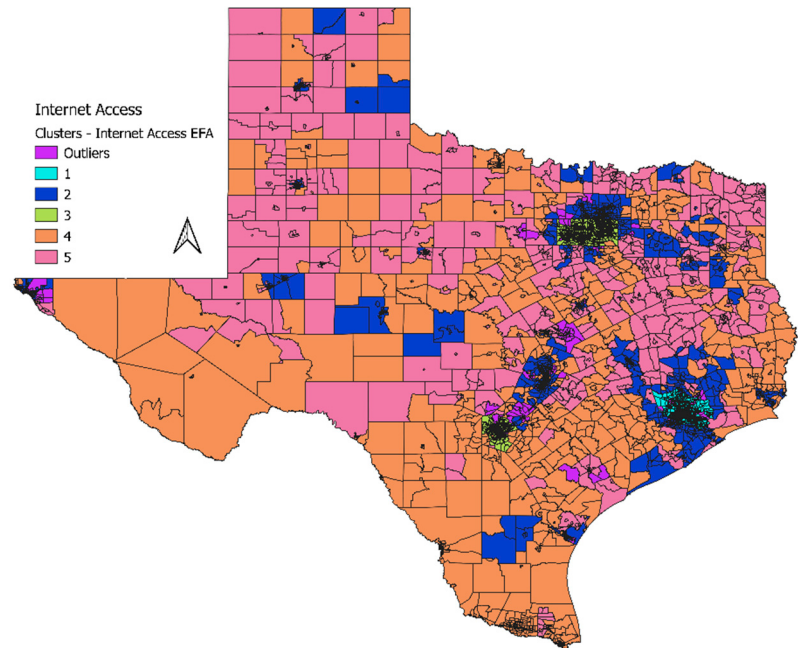

**Figure S1.** Clusters from k-means of internet access EFA.

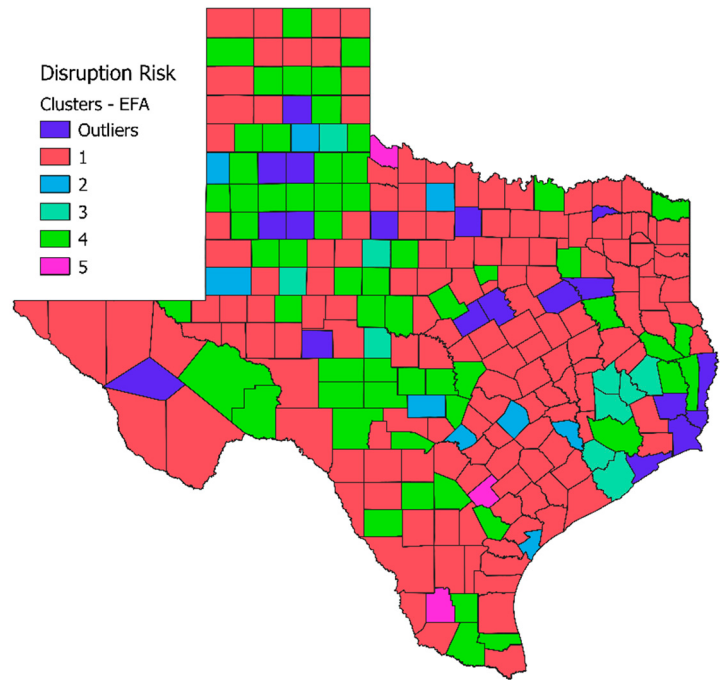

**Figure S2.** Clusters from k-means of sudden-onset disasters EFA.

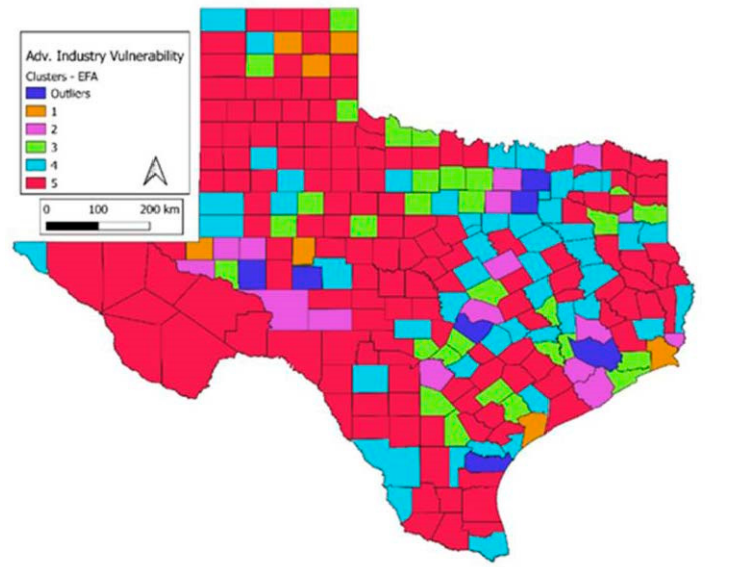

**Figure S3.** Clusters from k-means of advanced industries EFA.

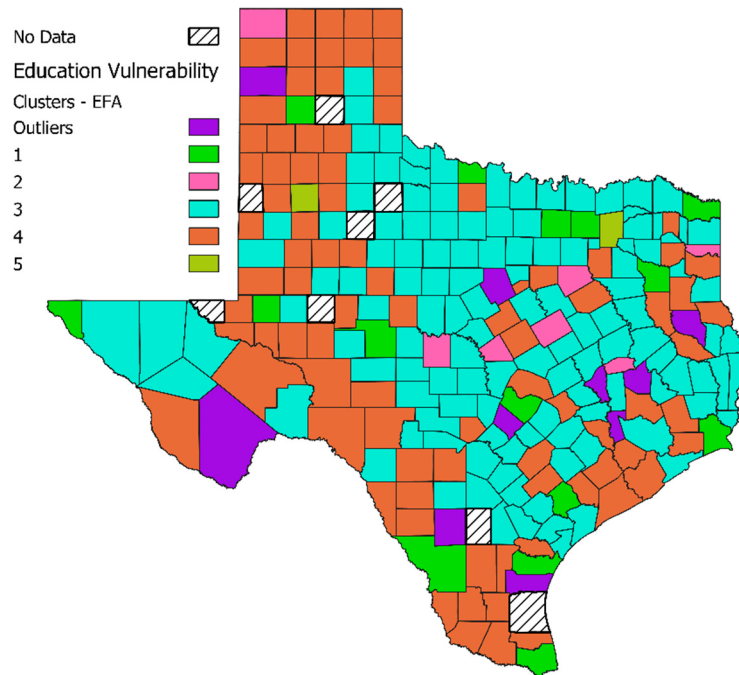

**Figure S4.** Clusters from k-means of education EFA.

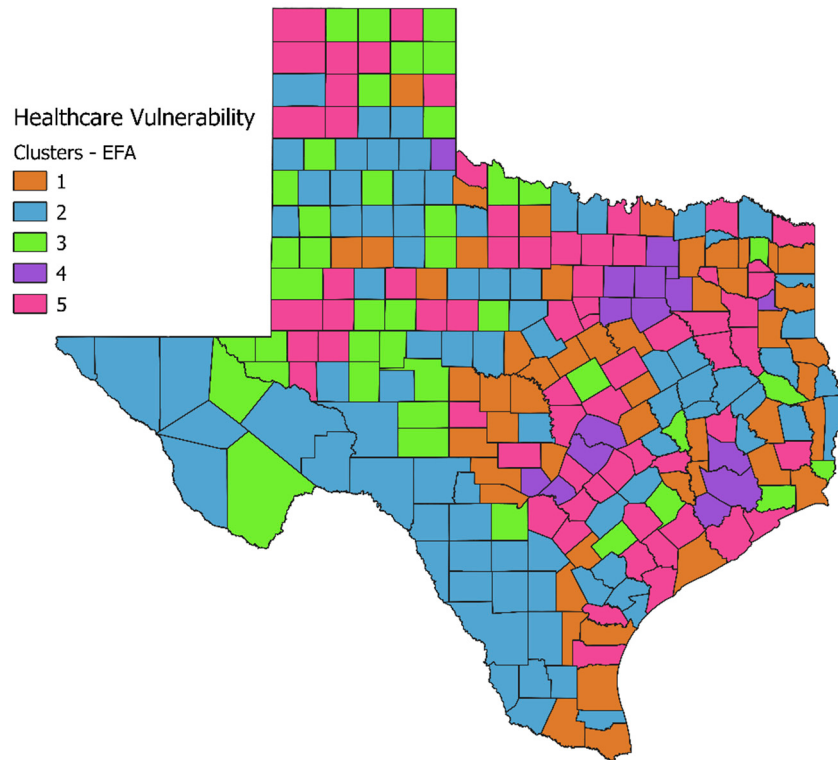

**Figure S5.** Clusters from k-means of healthcare/medical EFA.

## References

- Berliner E, Benmoshe B, Dvir A, Hadas Y (2016) Wireless Infrastructure Deployment Model for Sudden-Onset Disasters through real-time monitoring. 194–200
- Department of Homeland Security (2020) Hospitals
- Department of Homeland Security (2019) Colleges and Universities
- Federal Communications Commission (2020a) Fixed Broadband Deployment Data as of June 2019 - Version 1
- Federal Communications Commission (2020b) Actual Area Data for Cellular Coverage. In: Actual Area Data
- Federal Communications Commission (2020c) 2020 Broadband Deployment Report
- FEMA (2019) FIMA NFIP Redacted Claims Data Set
- FEMA (2020) Disaster Declarations Summary
- Health Resources and Services Administration (2020) Map Services
- National Center for Education Statistics (2019) Computer and Internet Use. In: Fast Facts. <https://nces.ed.gov/fastfacts/display.asp?id=46>. Accessed 11 Aug 2020
- NOAA National Centers for Environmental Information (2020) Storm Events Database. <https://www.ncdc.noaa.gov/stormevents/>
- Pease C (2020) HighSpeedInternet.com. In: High Speed Internet
- Roche D (2020) More Than 50% of U.S. K-12 Public School Students Will Be Going Back to School “Virtually” This Fall. In: Burbio. <https://info.burbio.com/press/>. Accessed 11 Aug 2020
- Rothwell J, Kulkarni S (2015) Data and Methods Appendix for America’s Advanced Industries: What They Are, Where They Are, Why They Matter
- Texas Department of Health and Human Services (2016) Directory of General and Special Hospitals. In: Hosp. - Gen. Hosp. <https://hhs.texas.gov/doing-business-hhs/provider-portals/health-care-facilities-regulation/hospitals-general-hos>

---

pitals. Accessed 11 Aug 2020

Texas Education Agency (2020) Countywide Totals

Texas Higher Education Data (2020) Distance Education Data

US Bureau of Labor Statistics (2020) Quaterly Census of Employment and Wages Location Quotient Detals. In: Quaterly Census Employ. Wages. <https://www.bls.gov/cew/about-data/location-quotients-explained.htm>. Accessed 18 Aug 2020.
